# Supplementary material for: Mapping of Outdoor Food and Beverage Advertising around Spanish Schools
Source: MDPI journal article supplement (doi:10.3390/nu14153167), 2022-07-31
Supplement: s1 [file s1]

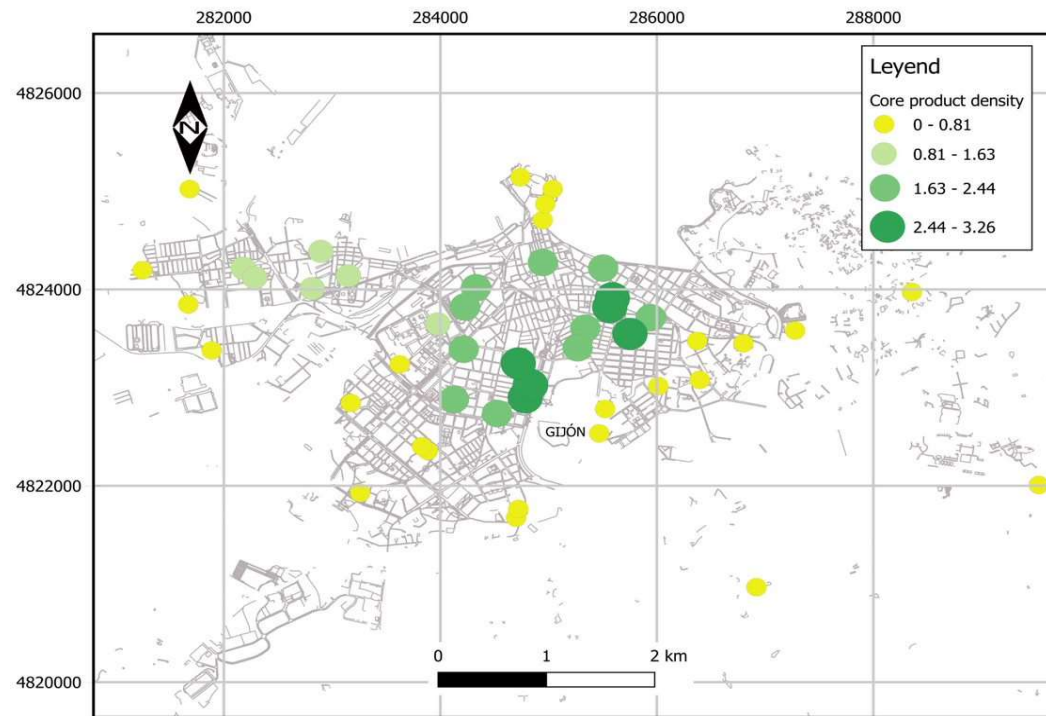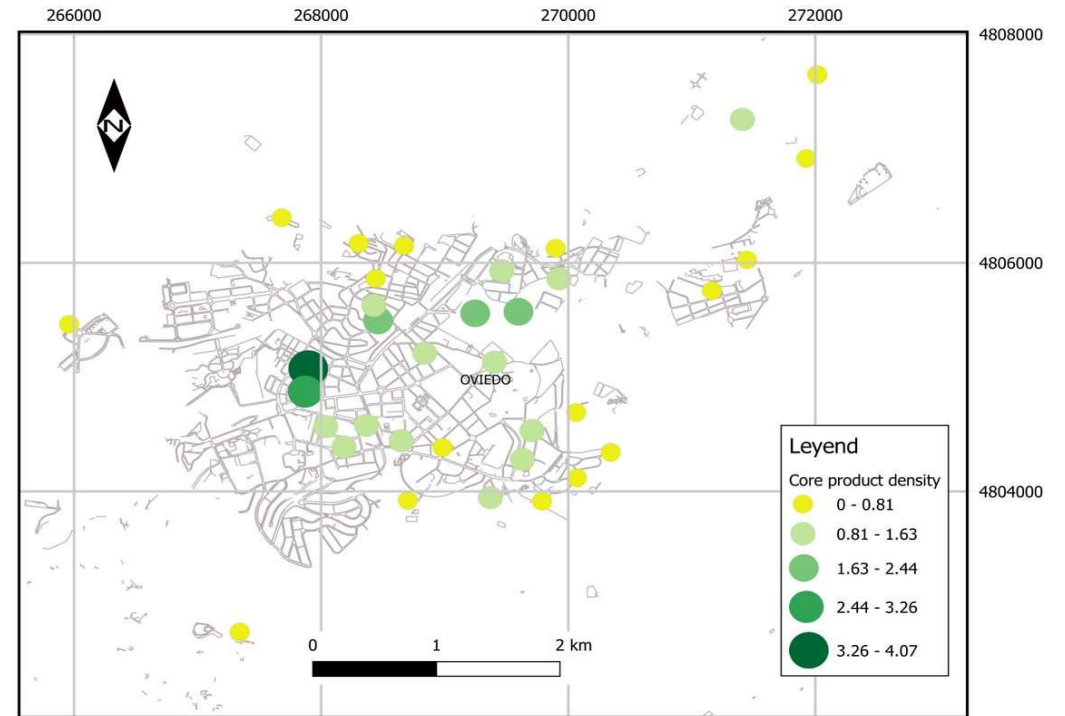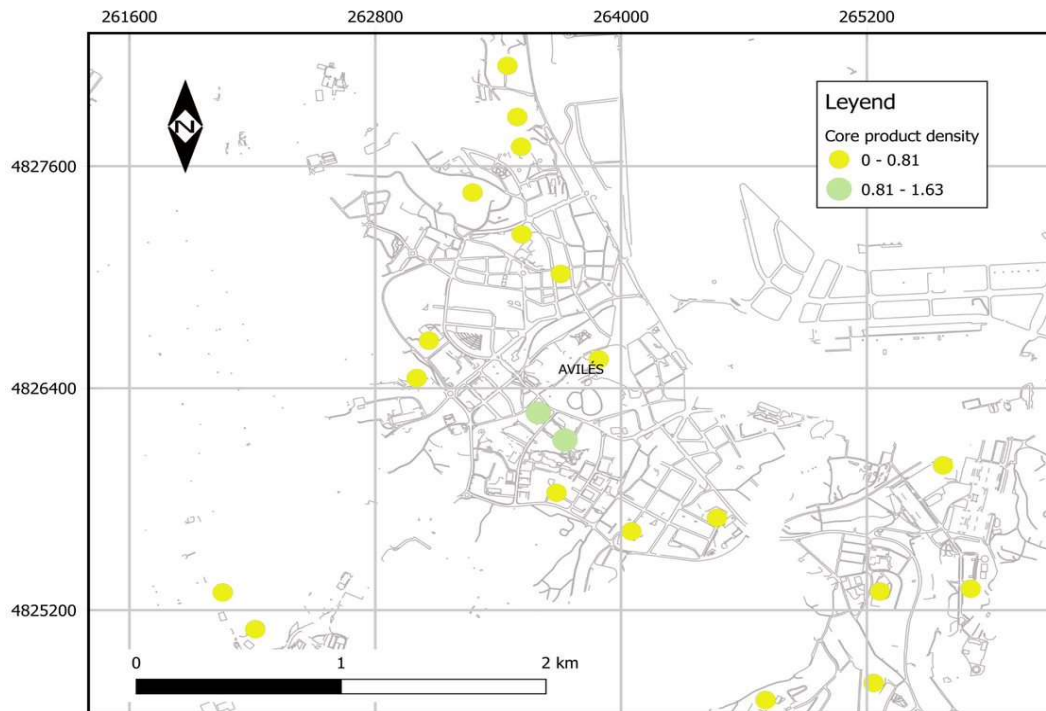

**Figure S1.** Density ( $\times 10^{-4}$  points/m<sup>2</sup>) of core products advertised in Gijón, Oviedo, and Avilés respectively. Coordinate reference system ETRS89, UTM 30N projection.

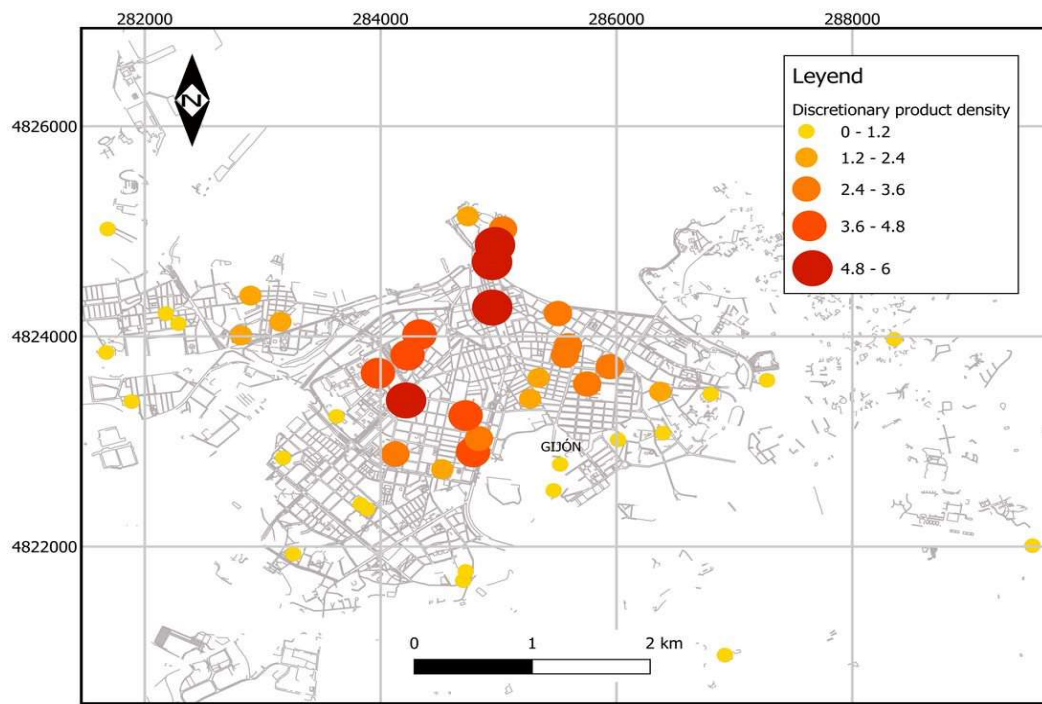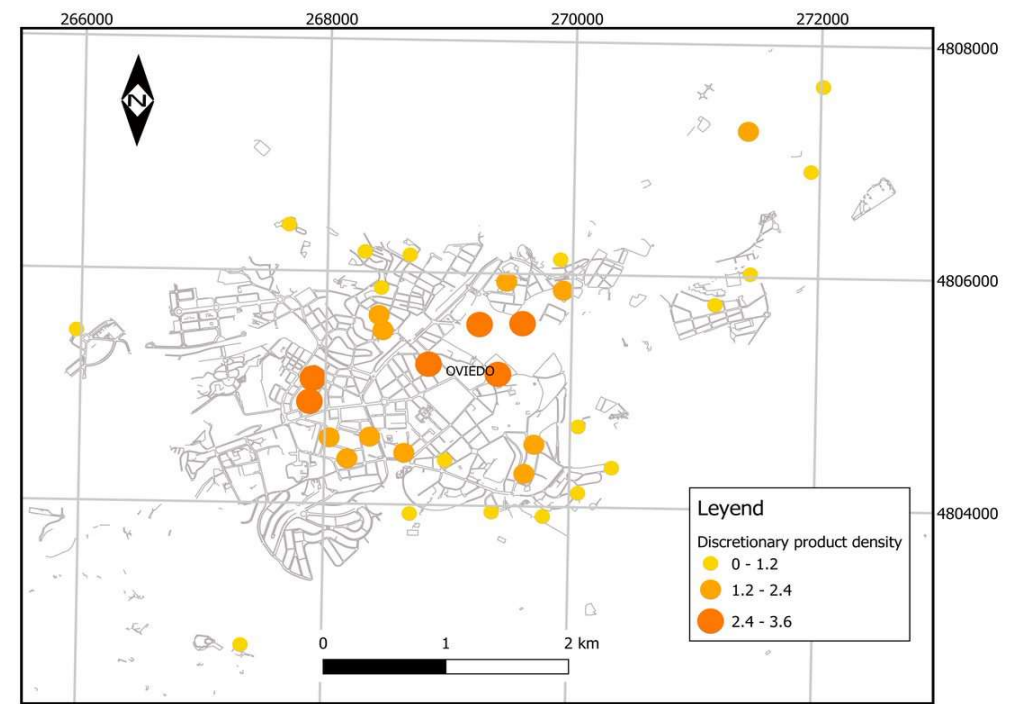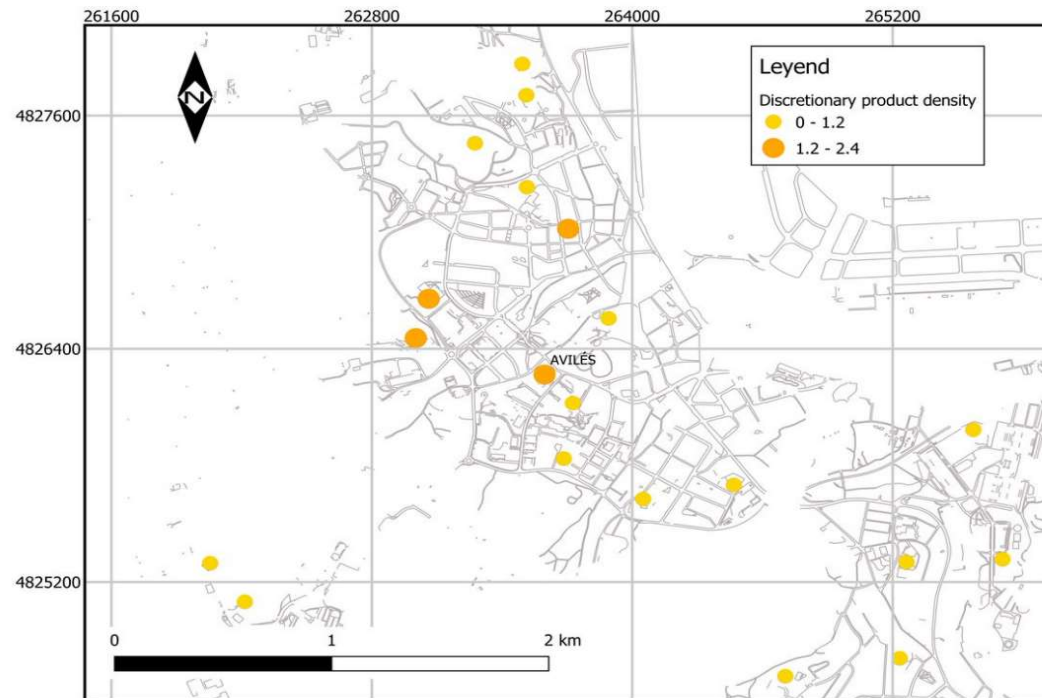

Figure S2. Density ( $\times 10^{-4}$  points/m<sup>2</sup>) of discretionary products advertised in Gijón, Oviedo and Avilés respectively. Coordinate reference system ETRS89, UTM 30N projection.

Supplementary file S2: products classification based on previous recommendations [19-21]

|                                     |                                              |                                                                                                                                                                                                                                                                       |
|-------------------------------------|----------------------------------------------|-----------------------------------------------------------------------------------------------------------------------------------------------------------------------------------------------------------------------------------------------------------------------|
| <b>Core/healthy</b>                 | Grains                                       | Rice, pasta, bread, breakfast cereals (< 30 g/100 g sugar or < 35 g/100 g sugar if includes fruit), savoury biscuits (energy < 1800 KJ/100 g)                                                                                                                         |
|                                     | Fruits                                       | Fresh, 100% fruit juice                                                                                                                                                                                                                                               |
|                                     | Vegetables                                   | Fresh, frozen, pre-packaged vegetable mixes, tomato puree and pastes, olives, vegetables cream                                                                                                                                                                        |
|                                     | Dairy and alternatives                       | Milk, all yoghurt, cheese, cream cheese                                                                                                                                                                                                                               |
|                                     | Meat and alternatives                        | Fresh/frozen/roasted, beef, pork, chicken, fish, canned fish, smoked fish, seafood products, eggs                                                                                                                                                                     |
|                                     | Oil                                          | Olive oil, sunflower oil                                                                                                                                                                                                                                              |
|                                     | Water                                        | Unflavored mineral water                                                                                                                                                                                                                                              |
| <b>Discretionary/<br/>unhealthy</b> | Processed meat                               | Sausages, hamburgers, bacon, processed delicatessen meats                                                                                                                                                                                                             |
|                                     | Chips and savory snacks                      | Chips and savory snacks, not sweet                                                                                                                                                                                                                                    |
|                                     | Fruit beverages                              | Fruit juice (not 100%, sugar added)                                                                                                                                                                                                                                   |
|                                     | Other beverages                              | Full sugar soft drinks, sugar added drinks, flavored milks, sport drinks, electrolyte drinks                                                                                                                                                                          |
|                                     | Desserts and Ice cream                       | Cake, sweet biscuits, scones, canned fruit in syrup, frozen yoghurt, sweet breads, pastries, doughnuts, ice cream, Breakfast cereals (> 30 g/100 g sugar or > 35 g/100 g sugar if includes fruit), savoury biscuits (energy > 1800 KJ/100 g), snack bars, jam, nougat |
|                                     | Chocolate and candy                          | Chewing gum, gummies, chocolate products, chocolate toppings, chocolate bars, sweetened cocoa                                                                                                                                                                         |
|                                     | Unhealthy ready meals, salt and fat products | Fast food, daily menu, pizza, burgers, nuggets, snack, sandwich, ready to eat and frozen meals and other salt or fat products (margarine, butter)                                                                                                                     |
|                                     | Soft and energy beverages                    | Diet, sugar-free soft drinks, energy drinks                                                                                                                                                                                                                           |
|                                     | Alcohol                                      | Alcohol beverages (Beer, wine, spirits, cider...)                                                                                                                                                                                                                     |
| <b>Others/<br/>Miscellaneous</b>    | Recipe additions                             | Herbs, spice, sauces                                                                                                                                                                                                                                                  |
|                                     | Tea and coffee                               | Tea, infusions and coffee                                                                                                                                                                                                                                             |

### Supplementary material S3. Density of core and discretionary products by city and school radius

#### Core Products

Gijón

| School code | Density (nx10-4(points/m2)) |
|-------------|-----------------------------|
| 33005350    | 0.43                        |
| 33006342    | 0.00                        |
| 33028601    | 0.00                        |
| 33005362    | 1.18                        |
| 33020545    | 1.20                        |
| 33020557    | 0.56                        |
| 33022554    | 1.04                        |
| 33022578    | 1.06                        |
| 33020570    | 1.03                        |
| 33022104    | 0.55                        |
| 33006445    | 0.14                        |
| 33021914    | 0.29                        |
| 33023601    | 1.99                        |
| 33022566    | 0.29                        |
| 33020314    | 0.15                        |
| 33005404    | 1.08                        |
| 33006007    | 2.42                        |
| 33021926    | 1.74                        |
| 33005957    | 1.97                        |
| 33005969    | 2.38                        |
| 33006081    | 0.20                        |
| 33005428    | 2.98                        |
| 33021872    | 0.04                        |
| 33006494    | 0.04                        |
| 33021653    | 2.72                        |
| 33019701    | 2.66                        |
| 33028982    | 1.66                        |
| 33022335    | 0.38                        |

|          |      |
|----------|------|
| 33006093 | 0.33 |
| 33005945 | 0.00 |
| 33006287 | 0.27 |
| 33005891 | 2.16 |
| 33005982 | 2.42 |
| 33005933 | 1.77 |
| 33027874 | 0.05 |
| 33005398 | 2.83 |
| 33005908 | 3.08 |
| 33005881 | 1.85 |
| 33024289 | 2.57 |
| 33005911 | 0.36 |
| 33005337 | 0.17 |
| 33005878 | 0.51 |
| 33021938 | 0.20 |
| 33006044 | 0.00 |
| 33021665 | 0.04 |
| 33006184 | 0.01 |
| 33005210 | 0.00 |

#### Oviedo

| School code | Density (nx10-4(points/m2)) |
|-------------|-----------------------------|
| 33013085    | 0.04                        |
| 33012721    | 0.00                        |
| 33012731    | 0.00                        |
| 33012664    | 4.07                        |
| 33021781    | 3.11                        |
| 33022581    | 1.69                        |
| 33012378    | 1.11                        |
| 33013103    | 0.14                        |
| 33013152    | 1.41                        |
| 33012639    | 2.27                        |
| 33012688    | 0.37                        |
| 33012457    | 1.53                        |
| 33012755    | 0.25                        |

|          |      |
|----------|------|
| 33012408 | 0.98 |
| 33012767 | 0.27 |
| 33012652 | 0.94 |
| 33012640 | 0.61 |
| 33012421 | 1.86 |
| 33012411 | 1.16 |
| 33022281 | 0.92 |
| 33012627 | 1.03 |
| 33022347 | 1.86 |
| 33023613 | 1.12 |
| 33012743 | 0.89 |
| 33012573 | 0.99 |
| 33013097 | 0.45 |
| 33012691 | 0.95 |
| 33012676 | 0.47 |
| 33012433 | 0.42 |
| 33020909 | 0.24 |
| 33021471 | 0.52 |
| 33012044 | 0.85 |
| 33012536 | 0.18 |
| 33028672 | 0.05 |
| 33028064 | 0.13 |

#### Avilés

| School code | Density (nx10-4(points/m2)) |
|-------------|-----------------------------|
| 33001216    | 0.00                        |
| 33001472    | 0.00                        |
| 33001319    | 0.67                        |
| 33022098    | 0.62                        |
| 33001022    | 0.00                        |
| 33001344    | 0.43                        |
| 33001046    | 0.00                        |
| 33001137    | 0.89                        |
| 33001228    | 0.00                        |
| 33020132    | 0.51                        |

|          |      |
|----------|------|
| 33001034 | 0.65 |
| 33001435 | 1.08 |
| 33001186 | 0.22 |
| 33001095 | 0.69 |
| 33022086 | 0.46 |
| 33001149 | 0.33 |
| 33001174 | 0.20 |
| 33001150 | 0.27 |
| 33022256 | 0.08 |
| 33001460 | 0.20 |
| 33001231 | 0.20 |

## Discretionary products

Gijón

| School code | Density (nx10-4(points/m2)) |
|-------------|-----------------------------|
| 33005350    | 0.45                        |
| 33006342    | 0.25                        |
| 33028601    | 0.06                        |
| 33005362    | 0.78                        |
| 33020545    | 1.03                        |
| 33020557    | 0.50                        |
| 33022554    | 1.59                        |
| 33022578    | 1.57                        |
| 33020570    | 1.68                        |
| 33022104    | 0.60                        |
| 33006445    | 0.24                        |
| 33021914    | 0.79                        |
| 33023601    | 5.90                        |
| 33022566    | 0.79                        |
| 33020314    | 1.07                        |
| 33005404    | 3.82                        |
| 33006007    | 3.11                        |
| 33021926    | 4.39                        |
| 33005957    | 4.23                        |
| 33005969    | 2.60                        |
| 33006081    | 2.30                        |
| 33005428    | 4.21                        |
| 33021872    | 0.15                        |

|          |      |
|----------|------|
| 33006494 | 0.15 |
| 33021653 | 3.91 |
| 33019701 | 3.60 |
| 33028982 | 6.47 |
| 33022335 | 5.53 |
| 33006093 | 5.09 |
| 33005945 | 0.00 |
| 33006287 | 2.95 |
| 33005891 | 1.91 |
| 33005982 | 1.87 |
| 33005933 | 3.21 |
| 33027874 | 0.13 |
| 33005398 | 3.30 |
| 33005908 | 3.25 |
| 33005881 | 3.31 |
| 33024289 | 2.98 |
| 33005911 | 1.12 |
| 33005337 | 0.51 |
| 33005878 | 1.69 |
| 33021938 | 0.71 |
| 33006044 | 0.00 |
| 33021665 | 0.18 |
| 33006184 | 0.03 |
| 33005210 | 0.00 |

#### Oviedo

| School code | Density (nx10-4(points/m2)) |
|-------------|-----------------------------|
| 33021471    | 0.97                        |
| 33012044    | 2.51                        |
| 33012536    | 0.39                        |
| 33028672    | 0.24                        |
| 33028064    | 0.71                        |
| 33013085    | 0.09                        |
| 33012721    | 0.00                        |
| 33012731    | 0.01                        |
| 33012664    | 3.11                        |
| 33021781    | 2.98                        |
| 33022581    | 1.99                        |
| 33012378    | 1.71                        |
| 33013103    | 0.33                        |
| 33013152    | 1.90                        |



|          |      |
|----------|------|
| 33012639 | 2.19 |
| 33012688 | 0.97 |
| 33012457 | 1.80 |
| 33012755 | 0.62 |
| 33012408 | 1.54 |
| 33012767 | 0.39 |
| 33012652 | 2.97 |
| 33012640 | 0.80 |
| 33012421 | 3.40 |
| 33012411 | 2.95 |
| 33022281 | 1.04 |
| 33012627 | 1.66 |
| 33022347 | 3.44 |
| 33023613 | 2.02 |
| 33012743 | 1.77 |
| 33012573 | 1.13 |
| 33013097 | 0.92 |
| 33012691 | 1.77 |
| 33012676 | 0.83 |
| 33012433 | 1.09 |
| 33020909 | 0.36 |

#### Avilés

| School code | Density (nx10-4(points/m2)) |
|-------------|-----------------------------|
| 33001216    | 0.00                        |
| 33020132    | 1.52                        |
| 33001034    | 0.97                        |
| 33001435    | 1.09                        |
| 33001186    | 0.81                        |
| 33001095    | 1.15                        |
| 33022086    | 1.06                        |
| 33001149    | 0.33                        |
| 33001174    | 0.48                        |
| 33001150    | 0.52                        |
| 33022256    | 0.32                        |
| 33001472    | 0.00                        |
| 33001460    | 0.27                        |
| 33001231    | 0.22                        |
| 33001319    | 1.34                        |
| 33022098    | 1.52                        |
| 33001022    | 0.06                        |

|          |      |
|----------|------|
| 33001344 | 1.01 |
| 33001046 | 0.06 |
| 33001137 | 1.58 |
| 33001228 | 0.09 |
